# Supplementary material for: Macrophage migration inhibitory factor enhances influenza-associated mortality in mice
Source: JCI journal article supplement (doi:10.1172/jci.insight.128034), 2019-07-10

**Supplemental Information (SI):**

**SI Figure 1:** Total macrophages, monocytes and neutrophils found in the airspaces of mice at 3/6 DPI. At 3 DPI the total (A) macrophages, (B) monocytes, (C) and neutrophils in airspaces. At 6 DPI the total (D) macrophages, (E) monocytes, (F) neutrophils in airspaces. Statistical differences were determined by 2-way ANOVA followed by Tukey multiple comparisons test. The violin plots are closed curves representing data's distribution and encapsulates the median, range, and inner-quartile range with each symbol representing a biological replicate. Data are representative of samples from 2 independent experiments with n=4-6 biological replicates/group. \* p < 0.05, \*\* p<0.01, \*\*\* p< 0.001, or \*\*\*\* p< 0.0001

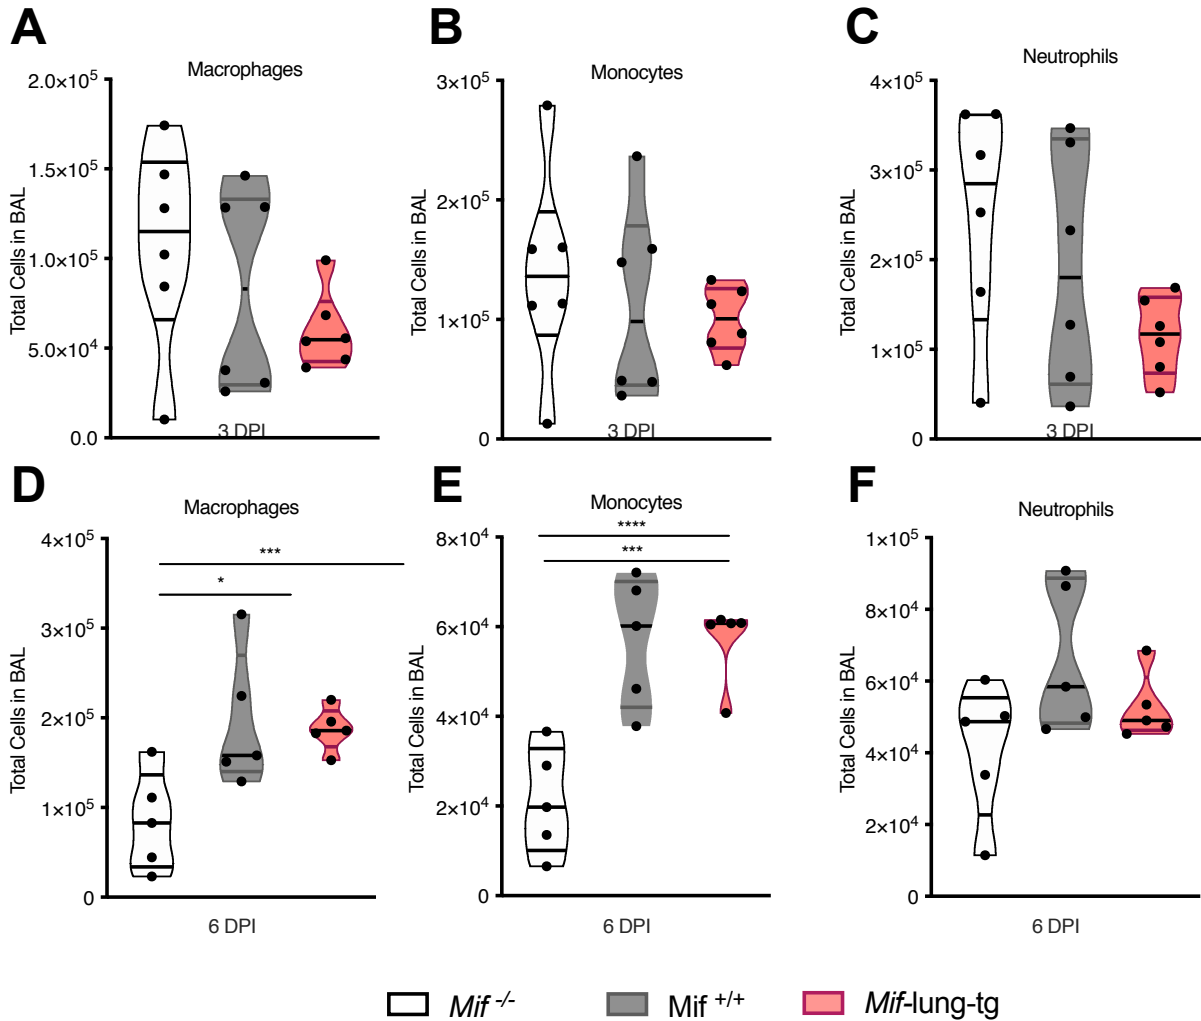

**SI Figure 2:** TRAF3 protein levels in lung lysate of mice at 1 DPI. Lung lysate TRAF3/ $\beta$ -actin protein measured by western blot at baseline and 1 DPI: **(A)** representative image of blot and **(B)** violin plot of TRAF3 normalized to  $\beta$ -actin. Statistical differences were determined by 1-way ANOVA followed by Tukey multiple comparisons test (B). The violin plots are closed curves representing data's distribution and encapsulates the median, range, and inner-quartile range with each symbol representing a biological replicate (B). Data are representative of 2 independent experiments with n=4-5 biological replicates/group (B).

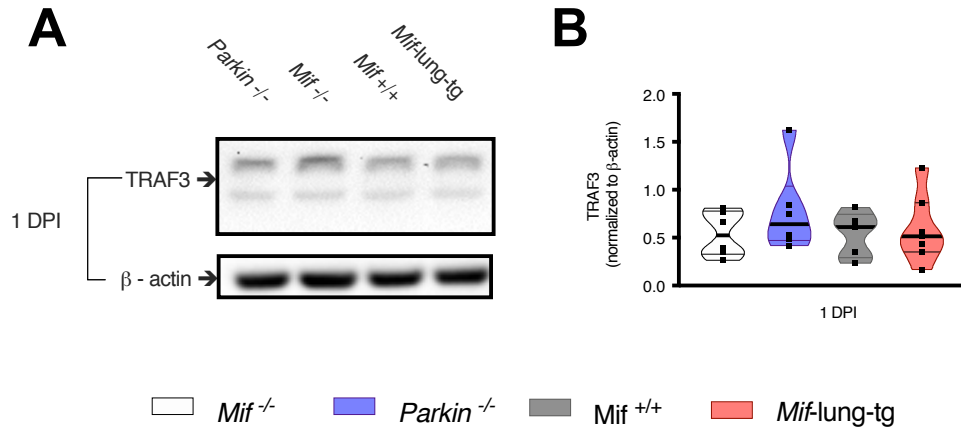

**SI Figure 3:** IFN- $\beta$  levels in cell culture media of AECs. Measurements from AECs 48 h after PR8 IAV MOI 1 infection or mock-infection: **(A)** violin plot of IFN- $\beta$  released from AECs. Statistical differences were determined by unpaired two-tailed Student *t* test (A). The violin plots are closed curves representing data's distribution and encapsulates the median, range, and inner-quartile range with each symbol representing a biological replicate (A-C). Data representative of pooled data with n=4 biological replicates/group (A). \*  $p < 0.05$ , \*\*  $p < 0.01$

**A**

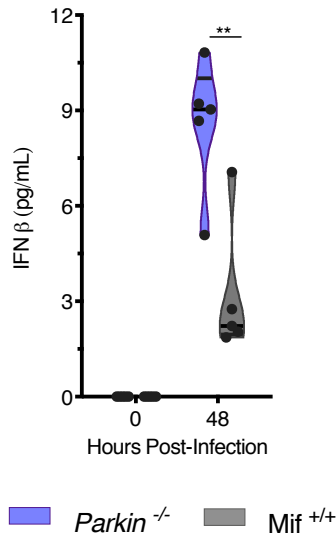

**SI Figure 4:** MIF release into Calu-3 cell culture media, IFN- $\lambda$ , and parkin pre- and post-infection. Measurements from Calu-3 at 24 h after PR8 IAV MOI 1 infection or mock-infection. **(A)** MIF released from Calu-3 cells, **(B)** IFN- $\lambda$ 3 western blot representative image, and **(C)** parkin representative image. Statistical differences were determined by unpaired two-tailed Student *t* test (A). The violin plots are closed curves representing data's distribution and encapsulates the median, range, and inner-quartile range with each symbol representing a biological replicate (A). Data representative of pooled data with n=4 -6 biological replicates/group (A). \*  $p < 0.05$ , \*\*  $p < 0.01$

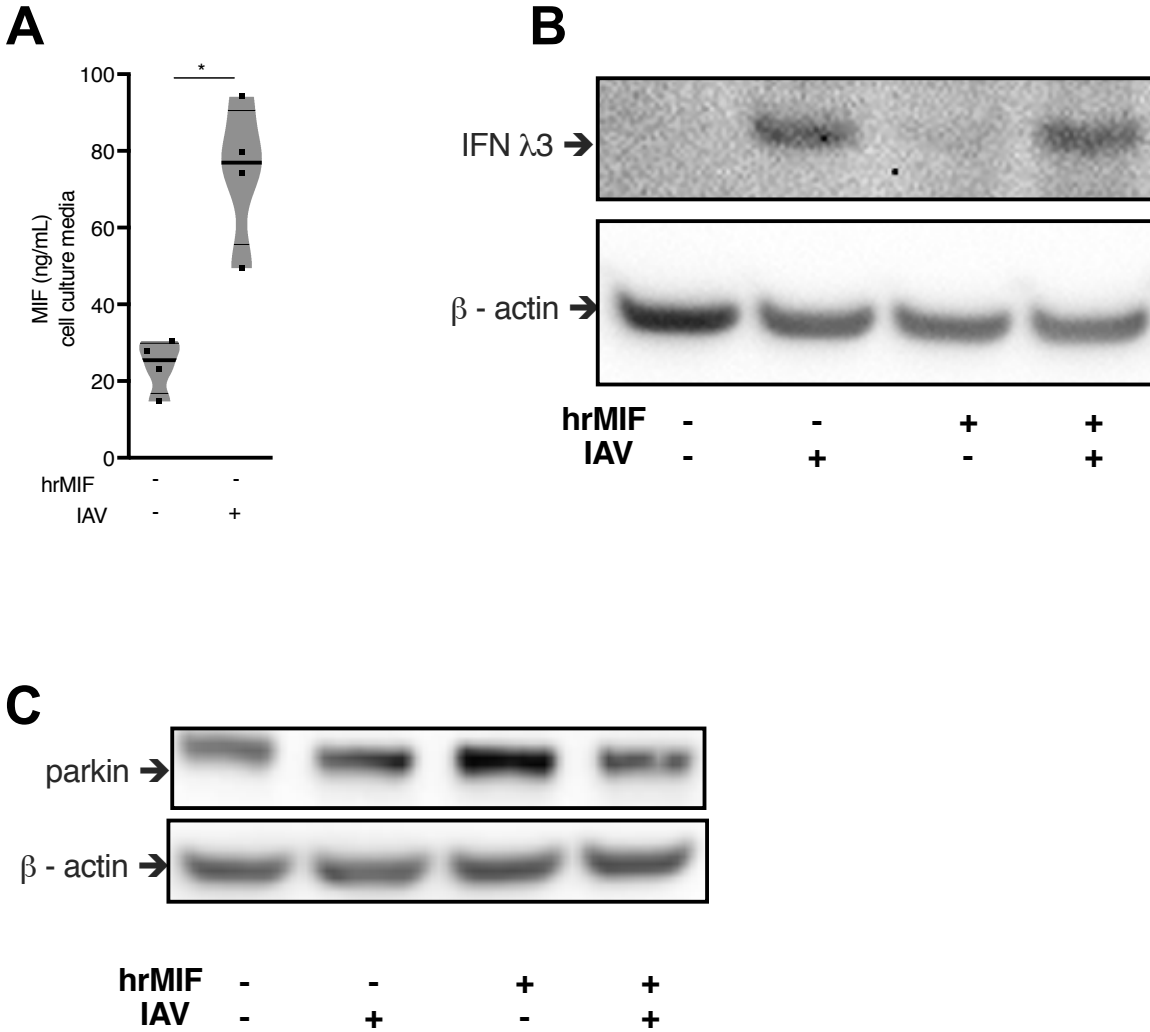

Supplement: sd1 [file 1]
